# Supplementary material
Source: PubMed Central journal article supplement (PMC1172245)
Supplement: pnas_0501620102_2.pdf [file pnas_0501620102_2.pdf]

**Table 4. Comparison of our method with COMPAREPROSPECTOR and PHYLOCON on 53 yeast coregulated gene datasets**

| Tf    | ~No. | Literature            | COMPAREPROSPECTOR      | PHYLOCON                 | Our method                         |
|-------|------|-----------------------|------------------------|--------------------------|------------------------------------|
| ABF1  | 210  | RTCAYTNNNNACGW        | TCGTATAAAGTGATA        | TCGTATAAAGTGATA          | TCACTTATACGAA                      |
| ACE2  | 69   | TGCTGGT               | NULL                   | NULL                     | TGCTGGCCCA                         |
| AZF1  | 12   | TTTTTCTT              | CATTTCTTTTTCTGC        | TTTTTCTT                 | AAAAGAAAAAAA                       |
| BAS1  | 31   | TGACTC                | AGCTGACTACAACC         | TGACTCTG                 | GACTCTGCCTAA                       |
| CAD1  | 23   | TTACTAA               | ATGATTAGTAAGCAA        | GCACGCGATGCTGACT<br>AATG | TTACTGAAAAAA                       |
| CBF1  | 11   | RTCACRTGA             | ATCACGTGACCATCA        | TCACGTGACC               | GGTCACGTGGTCA                      |
| CIN5  | 109  | TTACRTAA              | TGATTATGTAATCAT        | NULL                     | NULL                               |
| FKH1  | 122  | GGTAAACAA             | TTTTTGTTTACATTT        | TGTTTAC                  | AAAAGATAAACAA                      |
| FKH2  | 112  | GGTAAACAA             | GAAAAAGGTAAACAA        | NULL                     | GCGGGTAAAT                         |
| GAL4  | 10   | CGG(N11)CC            | CGGGCGACAGTGCTCCG<br>A | CGGTCAACTGTTGTCC<br>G    | TTCGGAACAAGGCGG<br>ACC             |
| GCN4  | 61   | TGACTCAT              | GGCAATGACTCATCC        | TGACTC                   | TGACTCAT                           |
| GCR1  | 7    | GGCTCCWC              | GAAAAAGTGAAGCT         | GAAGGAA                  | GGAAGCCACACAC                      |
| GLN3  | 12   | GATAAG                | ATGATATGGCTACGC        | NULL                     | GAGAGATAAAA                        |
| HAC1  | 14   | KGMCAGCGTGTC          | TTAACCAGGCGCGGC        | GACAGCG                  | TGCCACGTAA                         |
| HAP4  | 41   | ATTGG<br>YCNCCAATNANM | CGGACCAATCAGATG        | NULL                     | TTTCTTCCAAT                        |
| HAP5  | 8    | CCAAT                 | AGACTCCATTATTT         | CCAATGAG                 | TTTTTCCAAT                         |
| HSF1  | 7    | CTTCTAGAAG            | AGTTATATATTGATG        | TTTCCTT                  | NULL                               |
| INO2  | 32   | ATTTACATC             | TGCCACTCTTCCAAT        | NULL                     | AGCATGTGAAAAC                      |
| INO4  | 27   | TATTCATATGC           | TTTTACATGCTGTC         | TTTTACATG                | CATGTGAAAAT                        |
| LEU3  | 19   | GCCGGAACCGG           | GACCGGTACCGGCAT        | CGGTACCGCCT              | CGGAACCGGAAGA                      |
| MAC1  | 33   | GAGCAAA               | AGAAGATAAAGTAAA        | GAAAAAA                  | TTTTTTTTGCTCA                      |
| MBP1  | 96   | ACGCGT                | GTGTGTATGGGTGTG        | AAAAAAGACGCGT            | AACGCGTCACGA                       |
| MCM1  | 59   | TTACCNAATNNGAAA<br>*  | TTTCCAAATTAGGAA        | CCTAATTAGGAAA            | CCAAAATAGGAAAT                     |
| MET31 | 18   | AAACTGTGG             | TCACGTGACTAGCAA        | CACGTGATAT(cb1)          | TGTGGCGTA<br>CACGTGAAAAAC<br>(cb1) |

|       |     |                                            |                           |                          |                               |
|-------|-----|--------------------------------------------|---------------------------|--------------------------|-------------------------------|
| MET32 | 41  | AAACTGTGG                                  | GCACGTGATATTACA<br>(cbf1) | AGCACGAGAAAAAA<br>(cbf1) | AGCACGAGAAAAAA<br>(cbf1)      |
| MET4  | 9   | AAACTGTGG                                  | CCACAACTGTGGCTG           | CGTTTCTTTTTT<br>CTTTTTT  | CTGTGGCAA<br>GCACGTGAAA(cbf1) |
| MOT3  | 5   | (C/A/T)AGG(T/C)A                           | ACTTAAGAAGACATG           | TTATTTTT<br>GCTCGC       | GAAAGGAAA                     |
| MSN4  | 28  | MAGGGGN                                    | AGATGAACTAAAAAC           | NULL                     | CCCCTGAAAA                    |
| NRG1  | 48  | TGTCCCCTAATG<br>TCCCTCATTC                 | GGGCCAAGTGCCAAG           | NULL                     | CCCCTCCTCT                    |
| PDR1  | 45  | TTCCGCGGAA<br>TCCGTGGA<br>TCCGCGGA         | ACACACCACATACC<br>(rap1)  | TGAAAAATTT<br>GCGATGAG   | CACACCACACACC<br>(rap1)       |
| PDR3  | 18  | TCCGCGGA                                   | TCCACGACAACTGCA           | NULL                     | NULL                          |
| PHO4  | 60  | NNVCACGTKBGN                               | TTCATTTTTGTCACC           | TGGTCACACAGCAGG<br>GT    | TCTTTCTTG                     |
| RAP1  | 106 | ACACCATACATCT                              | TTACACCATACATT            | NULL                     | AGATGTATGGGTGT                |
| RCS1  | 24  | AMTGCACCCADTT                              | TAGTATTAAGCCTCG           | CACGTGGCTTA              | TTTTCAACTT                    |
| REB1  | 114 | NTTACCCGG                                  | TTGTTACCCGGATTG           | TTGTTACCCGGATTG          | CCGGGTAACAAAAA                |
| RFX1  | 16  | CTATTGCTGCAAC<br>GTTGCCATGGCG              | CGTTGCCATGGCAAC           | CATGGCAAC                | GCCATGGCAACGGA                |
| RLM1  | 41  | CTATTTATAG                                 | CTATTTTTAGATTAG           | NULL                     | TTTGCCGAG                     |
| ROX1  | 54  | YSYATTGTT                                  | TATATAACTTAACTA           | NULL                     | GCGTGGGGTAA                   |
| RPH1  | 7   | GtAAAGTAiGctTACTT<br>TgAC                  | GCATACCTGGGTGGG           | TTGCCCTGA                | CGCGCGCTCAGGAG                |
| RPN4  | 25  | GGTGGCAAA                                  | GGGAAACAGGAGGTG           | NULL                     | CGGCTCACAAA                   |
| SKN7  | 41  | ATTTGGCYGGSCC                              | GCCTGGCCCGGCACA           | NULL                     | GCGGCTGGCCA                   |
| SKO1  | 12  | TGACGTCA<br>AGTACGTCAT                     | AATGGCGTTAACGGT           | NULL                     | TGACGTAA                      |
| SIP4  | 7   | CCTTTAATCCG<br>CCATTCGGCCG<br>CCGTTTCGACCG | TGCATATTACTGTGT           | TTTTGTAACCA              | ACCCGGAA                      |
| SMP1  | 52  | ACTACTAwwwTAG                              | GGATGAGTGGGTCTG           | AGGACCC                  | NULL                          |
| STE12 | 45  | TGAAACA                                    | ATGTGTTTCAAATTG           | TGAAAC                   | TGTTTTCAA                     |
| SUM1  | 33  | ATTTGTGACactt                              | ATATTACTGACACT            | ATCAGTAA                 | TTTGTGCTACT                   |

|      |     |                                         |                                                 |                                                 |                                              |
|------|-----|-----------------------------------------|-------------------------------------------------|-------------------------------------------------|----------------------------------------------|
| SUT1 | 46  | AACGCGCAGG<br>AACGCGTGCC<br>ATCGCGCAATT | NULL                                            | NULL                                            | GCGCGGAAAA                                   |
| SWI4 | 113 | CGCGAAA<br>CACGAAAA                     | NULL                                            | TTCGCGTCGCGTTT                                  | TTTCGCGT                                     |
| SWI5 | 72  | ACCAGCA                                 | NULL                                            | NULL                                            | GGTGGGGTA                                    |
| SWI6 | 111 | CGCGAAA<br>CACGAAAA                     | NULL                                            | GACGCGT<br>CGCGAAA                              | ACGCGTCGCGA<br>GCGTCGCGAAA                   |
| UME6 | 101 | TGCCGCCGA<br>TAGCCGCCGA                 | ACTTCGGCGGCTAAA                                 | CCTCGGCGGCTAA                                   | CCTCGGCGGCTAA                                |
| YAP1 | 49  | NTGASTCAG<br>actcTTAGTAAagga            | TGATTAGTAATCATA                                 | TTAGTCAGCATC                                    | GCCGCTACTAAA                                 |
| ZAP1 | 15  | ACCCTAAAGGT                             | CATAACCTTTAGGGT                                 | ACCTTTAGGGT                                     | CCCTCAAGGTCAAA                               |
| 53   |     |                                         | 29+1 correct prediction, 18<br>wrong prediction | 24+1 correct prediction, 10<br>wrong prediction | 41 correct prediction, 8<br>wrong prediction |

Ref. 1 points out that the consensus site of CIN5 is TTACRTAA. We use TTACRTAA here instead of TRANSFAC one TTAATAA.

1. All transcription factors with known sites in ref. 1 and with experimentally verified sites in TRANSFAC (we can find the sites in TRANSFAC or the paper cited by TRANSFAC) will be used. But if the binding sites provided by TRANSFAC are too long or contradict with each other, we will not use them. By this criterion, we obtained the 53 transcription factors (Tf) tabulated above.

2. The criterion for matching with TRANSFAC motifs is that there should be at most one mismatch in the orange regions. Those orange regions must be continuous except the

ambiguous positions, such as SIP4 (colored orange according to ref. 1). The length of the orange parts must be at least 6 unless the motif is shorter than 6.

3. We know SWI4 works with SWI6, and MET4 works with MET31 and MET32. So if we find any sites matching either of them for the corresponding transcription factors, we will claim matching.

4. We output 10 motifs from COMPAREPROSPECTOR and our methods. For PHYLOCON, we manually check all the output motifs (on average, there are 60 output motifs for every transcription factor. Although there are some motifs appearing a few times in the output, we still give PHYLOCON a great advantage here, which may result in its high specificity). For our method, the motifs in Table 4 are the best motif in our output in more than 80% of the time.

5. The NULL in the last three columns means the outputs contain only AAAAA or TTTTT or TATATA- or CACACA-like segments. In the AAAAA and TTTTT cases, the outputs must have more than 90% of A or T. In the CACACA and TATATA cases, all of them must be CA or TA except the two boundary nucleotides. For those outputs as NULL, we treat them as no prediction.

6. Ambiguity Codes: D = A or T; B = C, G, or T; S = C or G; W = A or T; R = A or G; Y = C or T; K = G or T; M = A or C; V = A, C, or G; and N = A, C, G, or T.

7. The 29+1 in the last row of the table means there are 29 motifs output from COMPAREPROSPECTOR satisfying the criteria of matching defined above and there is another motif (SUM1) output from COMPAREPROSPECTOR that does not satisfy the criteria of matching defined above. 24+1 in the last row of the table has a similar meaning.

8. The true-positive rates of the tree Gibbs sampler, COMPAREPROSPECTOR, and PHYLOCON are  $41/53 = 77.4\%$ ,  $30/53 = 56.6\%$ , and  $25/53 = 47.2\%$ , respectively. The false-positive rates of tree Gibbs sampler, COMPAREPROSPECTOR, and PHYLOCON are  $8/49 = 16.3\%$ ,  $18/48 = 37.5\%$ , and  $10/35 = 28.6\%$ , respectively. Although we may not be so good as the authors at tuning parameters in using PHYLOCON and COMPAREPROSPECTOR, our method is better.

1. Harbison, C. T., Gordon, D. B., Lee, T. I., Rinaldi, N. J., Macisaac, K. D., Danford, T. W., Hannett, N. M., Tagne, J. B., Reynolds, D. B., Yoo, J., *et al.* (2004) *Nature* **431**, 99-104.
