# Supplementary material
Source: PubMed Central journal article supplement (PMC1172245)
Supplement: pnas_0501620102_3.pdf [file pnas_0501620102_3.pdf]

### Appendix 3: Motif Instances in Insect Ribosomal Protein Genes

In this file, we list the motifs found by the Gibbs sampler on the insect ribosomal dataset. Here we show the two motif logos first.

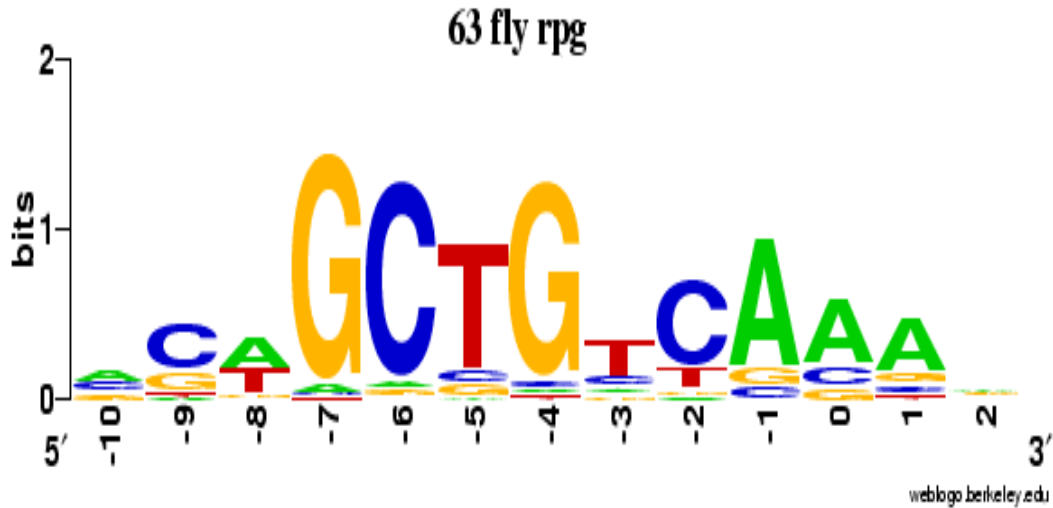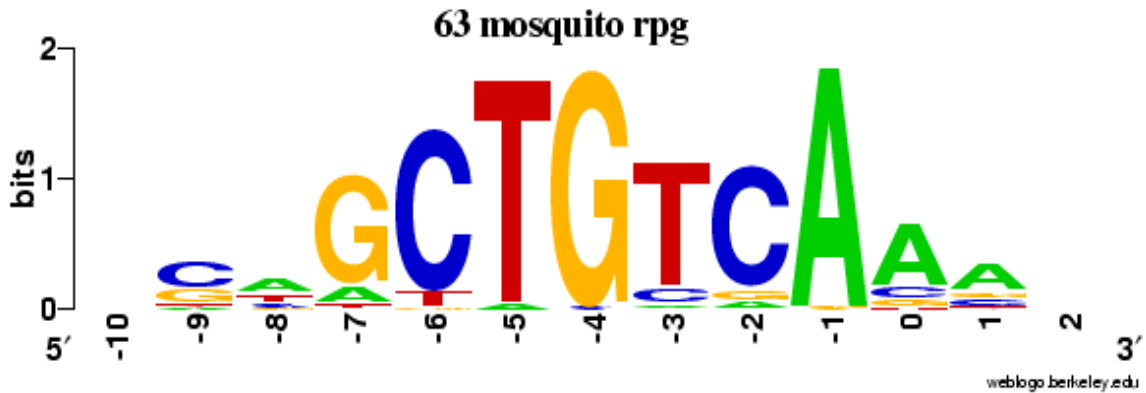

In the following, the consensus for fly and mosquito are on the left and right, respectively, of the first row. Then the weight matrices for the two species are listed. Finally, the motif instances are given for each gene we used (the 800 bp upstream of the ribosomal protein gene sequences for the two insect species are retrieved from Ensembl at [www.ensembl.org/](http://www.ensembl.org/)). The number of matches in the two instances is provided at the end of the alignment.

|                         |                         |
|-------------------------|-------------------------|
| ACAGCTGTCAAAA           | ACAGCTGTCAAAA           |
| 0.377 0.300 0.269 0.054 | 0.300 0.238 0.285 0.177 |
| 0.054 0.577 0.269 0.100 | 0.069 0.531 0.300 0.100 |
| 0.485 0.054 0.100 0.362 | 0.469 0.115 0.100 0.315 |
| 0.054 0.023 0.900 0.023 | 0.131 0.023 0.792 0.054 |
| 0.054 0.869 0.054 0.023 | 0.008 0.869 0.023 0.100 |
| 0.038 0.100 0.085 0.777 | 0.038 0.008 0.008 0.946 |
| 0.038 0.054 0.869 0.038 | 0.008 0.023 0.962 0.008 |
| 0.131 0.177 0.100 0.592 | 0.038 0.115 0.023 0.823 |
| 0.054 0.700 0.069 0.177 | 0.069 0.823 0.085 0.023 |
| 0.777 0.085 0.115 0.023 | 0.962 0.008 0.023 0.008 |
| 0.638 0.192 0.146 0.023 | 0.700 0.146 0.100 0.054 |
| 0.638 0.131 0.146 0.085 | 0.577 0.162 0.177 0.085 |
| 0.377 0.131 0.300 0.192 | 0.285 0.254 0.208 0.254 |

|        |               |    |
|--------|---------------|----|
| RPS3A  | ACAGGTCTCAAAT |    |
|        | CGCGCTGTCAAAA | 7  |
| RPL29  | CGAGCTGTGGAAT |    |
|        | AGAACTGTCAATA | 7  |
| RPL18A | CCAGCTATCGAAC |    |
|        | CGAGCTGTCAAAG | 9  |
| RPL31  | CCAGGAGGCACGC |    |
|        | CCAGCTGTCAAGC | 9  |
| RPS16  | GCAGCTGTCAGTG |    |
|        | GCTGCTGTCAAAA | 9  |
| RPL23  | AGAGATGTGAAAA |    |
|        | AGAGCTCTGAAAC | 10 |
| RPS24  | GCAGCTGGCAGGA |    |
|        | GCAACTGACAGCG | 9  |
| RPL11  | AGTGCTGTCCAAG |    |
|        | ACTGCTGTTGCAA | 8  |

|        |               |    |
|--------|---------------|----|
| RPLP1  | CCAGCTGTAACT  |    |
|        | GCTGCAGTAAAA  | 7  |
| RPS15  | AATGCCGCCAAAA |    |
|        | ACTGCTGCAAGCT | 7  |
| RPL12  | CTAGCTGAAGAAA |    |
|        | CTAGCTGTCAAAG | 9  |
| RPS18  | CGTGCTGTTAATA |    |
|        | AGACCTGTCAAAG | 7  |
| RPL19  | CCGGCTGTCAAAT |    |
|        | TCAGCTGTCAAGG | 9  |
| RPL37  | CCTGCGGACAAAA |    |
|        | TCGGCTGTCAAAA | 9  |
| RPS23  | AGTGCTGACAAAT |    |
|        | CAAGCTGTCAAAG | 8  |
| RPL23A | CCTCCTGTCAAAA |    |
|        | CATGCTGGCAAAG | 9  |
| RPL26  | TGAGCTATCAAAA |    |
|        | GGCGCTGTCACGT | 7  |
| RPS12  | GCTGCTGTCGTCG |    |
|        | GCTGCTGCGAAGA | 7  |
| RPS4   | ACAGCTGACAAAA |    |
|        | GAAGTTGTCAAAC | 8  |
| RPL10A | AGAGCAGCCAGAA |    |
|        | ACAAGTGTCAAAT | 7  |
| RPL28  | AGAGCTGGAAAAA |    |
|        | AGCGCTGCCAGTA | 8  |
| RPLP0  | ACAGCTGCTACGA |    |
|        | TCTACTGCAACAA | 8  |
| RPL14  | CGAGCTGTCAAAA |    |
|        | CGAGCTGTCATTG | 10 |
| RPL18  | CGTGCTGTTAAGG |    |

|        |               |    |
|--------|---------------|----|
|        | CCAGCTGTCAAAT | 8  |
| RPS17  | TCTGCTGCCACCG |    |
|        | CGTGTTGCCAACA | 8  |
| RPL8   | CCAGACGCCAAAC |    |
|        | ACAGCTGTCAAAC | 9  |
| RPS20  | ACTGCTGGCAATT |    |
|        | ACAACGTCAATG  | 9  |
| RPS8   | ACTGCTGTCGAAA |    |
|        | GGTGCTGTCAAGT | 8  |
| RPL34  | GCGGCGGTCAAGG |    |
|        | CGGGCTGTCAAAA | 8  |
| RPL13A | AGTGCTGACGGAA |    |
|        | GGAGCTGTCACTC | 6  |
| RPL35A | AAATCTGTCAGAA |    |
|        | AGAGCTGCCAGAC | 9  |
| RPS3   | GCAGCTCTCCAAC |    |
|        | GCAGTTGTCAAAA | 9  |
| RPL27  | ACGGCTGCCACTG |    |
|        | ACAGCTGTCAAAC | 8  |
| RPS27  | CCAGCTGTTCAGC |    |
|        | TTTGCTGTCAACA | 6  |
| RPL3   | CGTACTGCGAAAA |    |
|        | CGTACTGTCAAAC | 10 |
| RPS25  | GCAGCTGTAAGAT |    |
|        | GCAGCTGTCAAGC | 9  |
| RPS7   | GCAATTGTTACCA |    |
|        | GCAACTGTCAACT | 8  |
| RPL32  | AAAGCTGACAGAA |    |
|        | ATAGCTGTCACAT | 9  |
| RPL24  | ACAACGTCAACT  |    |
|        | ACAACAGTGAAAA | 9  |

|        |               |    |
|--------|---------------|----|
| RPLP2  | ATAGCCGGCAAGG |    |
|        | AAAGCTGTCAAGA | 9  |
| RPL13  | ACCGCTGTCCAAG |    |
|        | ACTGCTGTCACCC | 8  |
| RPS2   | ATTGCTGTAAAT  |    |
|        | TCTGTTGTAAACA | 7  |
| RPL21  | ACAGCTGTTAAG  |    |
|        | TGAGCTGTCAAAC | 8  |
| RPL30  | TGAGCCGTCACAA |    |
|        | GGTTCTGTCAAAA | 8  |
| RPL27A | GGTGCTGTTAAGC |    |
|        | GCCGCTGTCAAAC | 9  |
| RPL9   | GGTGCTGTTAACG |    |
|        | TTCGCTGTCACAT | 6  |
| RPS27A | GCCGCCGTCGAAG |    |
|        | GTCGTTGTCAAAA | 7  |
| RPS13  | AGAGCTGTCAACG |    |
|        | ACTGGTGTGAAAT | 7  |
| RPS21  | CCAGCTGGCAAAG |    |
|        | ACAGCTGTCAAAT | 10 |
| RPL7   | CGGGCTGTCAAAT |    |
|        | CGGGCTGTCAAAT | 13 |
| RPS26  | ACTGCTTACACTA |    |
|        | TCTGCTGTCACGG | 8  |
| RPL37A | GCGGCGGTCACAC |    |
|        | TGATCTGTCAAAC | 7  |
| RPS9   | ACAGACGTGAAAG |    |
|        | ACCGCTGTGATCG | 7  |
| RPS19  | GCCGCGGCCAAAT |    |
|        | GCGGCTGTCAGAG | 8  |
| RPS14  | GTAGCTGTCAAAA |    |

|        |               |   |
|--------|---------------|---|
|        | CCGGTTGTCAAAT | 8 |
| RPS6   | CCTGGTCTCACAA |   |
|        | GCAGCTGTCAAGC | 6 |
| RPS15A | GTTGCTGTCAGCA |   |
|        | GCGGCTGTCACGG | 8 |
| RPL7A  | GCTGCTTCCAAAG |   |
|        | GCTGCTGTCATGT | 8 |
| RPS10  | ATTGCTGACACAT |   |
|        | TTATCTGTCAAAT | 7 |
| RPL22  | GCTGCGGCCACAC |   |
|        | ACTGCTGCCAACT | 8 |
| RPL36  | CCAGCTGTCCAAG |   |
|        | CGTGCTGTCAAAC | 9 |
| RPL35  | GCTGCTGTTACAG |   |
|        | TCTGCTGACAACT | 7 |
| RPS5   | CCGGCTGCCAGGG |   |
|        | CCAGCTGTCAGAC | 9 |
